# Supplementary material for: Streptomyces Application Triggers Reassembly and Optimization of the Rhizosphere Microbiome of Cucumber
Source: MDPI journal article supplement (doi:10.3390/d13090413), 2021-08-29
Supplement: s1 [file s1]

**Table S1** Major topological properties of the co-occurrence network of microbiome in rhizosphere of cucumber.

| Groups   | Treatments         | Nodes | Nodes<br>connected<br>with <i>Strep.</i> | Number<br>of Links | ND<br>(Network<br>diameter) | MD<br>(modularity) | CC<br>(Clustering<br>coefficient) | GD<br>(Graph<br>density) | AD<br>(Average<br>degree) | APL<br>(Average path<br>length) |
|----------|--------------------|-------|------------------------------------------|--------------------|-----------------------------|--------------------|-----------------------------------|--------------------------|---------------------------|---------------------------------|
| Bacteria | Control            | 296   | 20                                       | 2342               | 4                           | 0.484              | 0.318                             | 0.054                    | 15.824                    | 2.641                           |
|          | With <i>Strep.</i> | 313   | 41                                       | 3536               | 4                           | 0.441              | 0.350                             | 0.066                    | 15.525                    | 2.525                           |
| Fungi    | Control            | 62    | 1                                        | 405                | 5                           | 0.218              | 0.526                             | 0.214                    | 13.065                    | 2.26                            |
|          | With <i>Strep.</i> | 69    | 4                                        | 399                | 6                           | 0.285              | 0.462                             | 0.170                    | 11.565                    | 2.498                           |

**Table S2** Biomass of cucumber after the inoculation with *Streptomyces* Act12<sup>1</sup>

| Inoculation        | Concentration<br>g kg <sup>-1</sup> soil | Biomass in 20 <sup>th</sup> d<br>g plant <sup>-1</sup> |        | Biomass in 45 <sup>th</sup> d<br>g plant <sup>-1</sup> |        |
|--------------------|------------------------------------------|--------------------------------------------------------|--------|--------------------------------------------------------|--------|
|                    |                                          | Mean                                                   | ΔCtrl% | Mean                                                   | ΔCtrl% |
| CK                 |                                          | 13.91±0.94ab                                           | -      | 19.28±0.73ab                                           | -      |
| Act12 <sup>2</sup> | 1.0                                      | 16.87±2.62a                                            | 21.2   | 21.79±3.58a                                            | 13.0   |
|                    | 1.5                                      | 16.53±3.04a                                            | 18.8   | 22.47±1.67a                                            | 16.5   |
|                    | 2.0                                      | 15.24±1.93a                                            | 9.6    | 19.69±1.65ab                                           | 2.1    |
| HK <sup>3</sup>    |                                          | 10.13±1.31c                                            | -      | 19.90±1.19bc                                           | -      |
| Act12+HK           | 1.0                                      | 15.38±2.47b                                            | 51.9   | 19.77±0.67c                                            | -0.6   |
|                    | 1.5                                      | 18.12±1.37ab                                           | 78.9   | 25.60±4.32a                                            | 28.6   |
|                    | 2.0                                      | 18.95±1.52a                                            | 87.0   | 23.71±0.66ab                                           | 19.2   |

<sup>1</sup>Three duplicates were set up in a pot experiment planting with cucumber, control was treated without *Streptomyces*. Values are means ± standard deviation ( $n = 3$ ). Different letters indicate statistically significant difference between the control and *Streptomyces* treatments, at the level of  $P < 0.05$ .

<sup>2</sup> The *Streptomyces* bio-agent was  $2.59 \times 10^{11}$  CFU·g<sup>-1</sup>.

<sup>3</sup> HK represents inoculated with pathogens *F. oxysporum* with concentration of  $10^2$  CFU·g<sup>-1</sup> soil.

**Table S3** Root weight and length of cucumber after the inoculation with *Streptomyces* Act12<sup>1</sup>

| Inoculation        | Concentration<br>g kg <sup>-1</sup> soil | Root weight in 20 <sup>th</sup> d<br>g plant <sup>-1</sup> |        | Root weight in 45 <sup>th</sup> d<br>g plant <sup>-1</sup> |       | Root length in 45 <sup>th</sup> d<br>cm |       |
|--------------------|------------------------------------------|------------------------------------------------------------|--------|------------------------------------------------------------|-------|-----------------------------------------|-------|
|                    |                                          | Mean                                                       | ΔCtrl% | Mean                                                       | ΔCtrl | Mean                                    | ΔCtrl |
| CK                 |                                          | 0.55±0.15b                                                 | -      | 1.70±0.17b                                                 | -     | 7.94±0.55b                              | -     |
| Act12 <sup>2</sup> | 1.0                                      | 1.42±0.22a                                                 | 157.7  | 2.09±0.33a                                                 | 22.9  | 12.45±0.56a                             | 56.8  |
|                    | 1.5                                      | 1.79±0.35a                                                 | 225.0  | 1.95±0.09ab                                                | 14.4  | 12.49±0.99a                             | 57.3  |
|                    | 2.0                                      | 0.91±0.07b                                                 | 66.1   | 1.78±0.14ab                                                | 4.4   | 13.02±0.77a                             | 63.9  |
| HK <sup>3</sup>    |                                          | 0.79±0.28c                                                 | -      | 1.59±0.17a                                                 | -     | 6.90±0.97c                              | -     |
| Act12+HK           | 1.0                                      | 1.34±0.37b                                                 | 69.6   | 1.85±0.02a                                                 | 16.6  | 12.04±1.93bc                            | 74.6  |
|                    | 1.5                                      | 1.70±0.3ab                                                 | 114.6  | 2.08±0.3a                                                  | 30.6  | 18.12±0.29a                             | 162.  |
|                    | 2.0                                      | 1.96±0.36a                                                 | 147.5  | 1.73±0.43a                                                 | 9.0   | 14.49±2.32b                             | 110.  |

<sup>1</sup> Three duplicates were set up in a pot experiment planting with cucumber, control was treated without *Streptomyces*. Values are means ± standard deviation ( $n = 3$ ). Different letters indicate statistically significant difference between the control and *Streptomyces* treatments, at the level of  $P < 0.05$ .

<sup>2</sup> The *Streptomyces* bio-agent was  $2.59 \times 10^{11}$  CFU·g<sup>-1</sup>.

<sup>3</sup> HK represents inoculated with pathogens *F. oxysporum* with concentration of  $10^2$  CFU·g<sup>-1</sup> soil.

**Table S4** Root activity after the inoculation with *Streptomyces* Act12<sup>1</sup>

| Inoculation        | Concentration<br>g kg <sup>-1</sup> soil | Root activity in 20 <sup>th</sup> d<br>g·g <sup>-1</sup> ·h <sup>-1</sup> |        | Root activity in 45 <sup>th</sup> d<br>g·g <sup>-1</sup> ·h <sup>-1</sup> |        |
|--------------------|------------------------------------------|---------------------------------------------------------------------------|--------|---------------------------------------------------------------------------|--------|
|                    |                                          | Mean                                                                      | ΔCtrl% | Mean                                                                      | ΔCtrl% |
| CK                 |                                          | 0.12±0.03d                                                                | -      | 0.07±0.03a                                                                | -      |
| Act12 <sup>2</sup> | 1.0                                      | 1.01±0.13a                                                                | 741.6  | 0.08±0.03a                                                                | 17.1   |
|                    | 1.5                                      | 0.70±0.02b                                                                | 482.0  | 0.07±0.03a                                                                | -5.9   |
|                    | 2.0                                      | 0.26±0.01c                                                                | 114.3  | 0.05±0.02a                                                                | -23.1  |
| HK <sup>3</sup>    |                                          | 0.15±0.06d                                                                | -      | 0.07±0.02b                                                                | -      |
| Act12+HK           | 1.0                                      | 0.69±0.00ab                                                               | 362.0  | 0.18±0.01a                                                                | 161.0  |
|                    | 1.5                                      | 0.80±0.04a                                                                | 433.4  | 0.09±0.03b                                                                | 32.3   |
|                    | 2.0                                      | 0.50±0.00bc                                                               | 232.8  | 0.07±0.01b                                                                | 0.5    |

<sup>1</sup>Three duplicates were set up in a pot experiment planting with cucumber, control was treated without *Streptomyces*. Values are means ± standard deviation ( $n = 3$ ). Different letters indicate statistically significant difference between the control and *Streptomyces* treatments, at the level of  $P < 0.05$ .

<sup>2</sup> The *Streptomyces* bio-agent was  $2.59 \times 10^{11}$  CFU·g<sup>-1</sup>.

<sup>3</sup> HK represents inoculated with pathogens *F. oxysporum* with concentration of  $10^2$  CFU·g<sup>-1</sup> soil.

**Table S5** Leaf area and SPAD after the inoculation with *Streptomyces* Act12<sup>1</sup> in the 45<sup>th</sup> day.

| Inoculation        | Concentration<br>g kg <sup>-1</sup> soil | Leaf area cm <sup>2</sup> |        | SPAD        |        |
|--------------------|------------------------------------------|---------------------------|--------|-------------|--------|
|                    |                                          | Mean                      | ΔCtrl% | Mean        | ΔCtrl% |
| CK                 |                                          | 53.08±9.15b               | -      | 39.74±1.96a | -      |
| Act12 <sup>2</sup> | 1.0                                      | 77.33±7.97a               | 45.7   | 43.38±5.02a | 9.2    |
|                    | 1.5                                      | 77.13±12.34a              | 45.3   | 41.58±4.11a | 4.6    |
|                    | 2.0                                      | 62.18±4.10b               | 17.1   | 41.01±2.54a | 3.2    |
| HK <sup>3</sup>    |                                          | 54.97±4.15c               | -      | 38.37±3.85a | -      |
| Act12+HK           | 1.0                                      | 64.54±5.29bc              | 17.4   | 40.34±2.51a | 5.1    |
|                    | 1.5                                      | 82.45±16.29a              | 50.0   | 41.34±2.28a | 7.7    |
|                    | 2.0                                      | 73.67±3.09ab              | 34.0   | 40.96±2.17a | 6.8    |

<sup>1</sup> Three duplicates were set up in a pot experiment planting with cucumber, control was treated without *Streptomyces*. Values are means ± standard deviation ( $n = 3$ ). Different letters indicate statistically significant difference between the control and *Streptomyces* treatments, at the level of  $P < 0.05$ .

<sup>2</sup> The *Streptomyces* bio-agent was  $2.59 \times 10^{11}$  CFU·g<sup>-1</sup>.

<sup>3</sup> HK represents inoculated with pathogens *F. oxysporum* with concentration of  $10^2$  CFU·g<sup>-1</sup> soil.

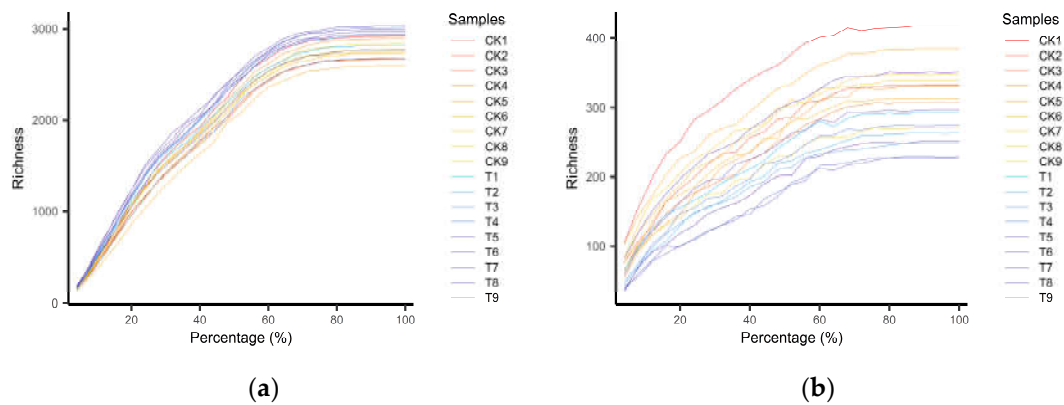

**Figure S1.** The rarefaction curve by each samples of the rhizosphere microbiome associated with cucumber plants in *Streptomyces*-inoculated soil (T) and uninoculated control soil (CK) *Streptomyces*. (a) The rarefaction curves of bacteria; (b) the rarefaction curves of fungi.
